# Supplementary material for: Multimorbidity Patterns in US Adults with Subjective Cognitive Decline and Their Relationship with Functional Difficulties
Source: PubMed Central journal article supplement — J Aging Health. 2022 Mar 24;34(6-8):929–38. doi: 10.1177/08982643221080287 (PMC9483692; doi:10.1177/08982643221080287), 2022-03-24
Supplement: sj-pdf-1-jah-10.1177_08982643221080287.pdf [file sj-pdf-1-jah-10.1177_08982643221080287.pdf]

Supplemental material for Multimorbidity Patterns in the US Adults with Subjective Cognitive  
Decline and Their Relationship with Functional Difficulties

## Appendix 1: Frequency, histogram and missing summary of all variables

| Variable          | Stats. Values                                                       | Frequency (%)    | Histogram | Missing (%)  |
|-------------------|---------------------------------------------------------------------|------------------|-----------|--------------|
| Age group         | 1. 45-49                                                            | 1135 ( 7.30% )   |           | 131 (0.8%)   |
|                   | 2. 50-54                                                            | 1597 ( 10.30% )  |           |              |
|                   | 3. 55-59                                                            | 1978 ( 12.80% )  |           |              |
|                   | 4. 60-64                                                            | 2212 ( 14.30% )  |           |              |
|                   | 5. 65-69                                                            | 2034 ( 13.10% )  |           |              |
|                   | 6. 70-74                                                            | 2035 ( 13.10% )  |           |              |
|                   | 7. 75-79                                                            | 1760 ( 11.40% )  |           |              |
|                   | 8. 80+                                                              | 2739 ( 17.70% )  |           |              |
| Sex               | 1. Male                                                             | 6889 ( 44.10% )  |           | 0 (0.0%)     |
|                   | 2. Female                                                           | 8732 ( 55.90% )  |           |              |
| Race              | 1. Non-white                                                        | 12291 ( 80.30% ) |           | 319 (2.0%)   |
|                   | 2. white                                                            | 3011 ( 19.70% )  |           |              |
| Urban/rural       | 1. Rural counties                                                   | 2509 ( 16.10% )  |           | 0 (0.0%)     |
|                   | 2. Ruban counties                                                   | 13112 ( 83.90% ) |           |              |
| Educational level | 1. Didnot graduate high scho                                        | 1935 ( 12.40% )  |           | 40 (0.3%)    |
|                   | 2. Graduated high school                                            | 4873 ( 31.30% )  |           |              |
|                   | 3. Attended college/tech sch                                        | 4481 ( 28.80% )  |           |              |
|                   | 4. Graduated college/tech sch                                       | 4292 ( 27.50% )  |           |              |
| Household income  | 1. < \$15, 000                                                      | 2359 ( 18.40% )  |           | 2786 (17.8%) |
|                   | 2. \$15, 000 to < \$25,000                                          | 3169 ( 24.70% )  |           |              |
|                   | 3. \$25,000 to < \$35,000                                           | 1598 ( 12.50% )  |           |              |
|                   | 4. \$35, 000 to < \$50,000                                          | 1784 ( 13.90% )  |           |              |
|                   | 5. \$50, 000 +                                                      | 3925 ( 30.60% )  |           |              |
| Employment status | 1. Out of work/homemaker/student                                    | 5163 ( 33.20% )  |           | 71 (0.5%)    |
|                   | 2. Retired                                                          | 7114 ( 45.70% )  |           |              |
|                   | 3. Unable to work                                                   | 3273 ( 21.00% )  |           |              |
| Marital status    | 1. Divorced/widowed/separated/never married                         | 8554 ( 55.10% )  |           | 83 (0.5%)    |
|                   | 2. Married/member of an unmarried couple                            | 6984 ( 44.90% )  |           |              |
| Hypertension      | 1. No high blood pressure                                           | 5886 ( 37.80% )  |           | 54 (0.3%)    |
|                   | 2. High blood pressure                                              | 9681 ( 62.20% )  |           |              |
| Diabetes          | 1. No diabetes                                                      | 11274 ( 72.40% ) |           | 45 (0.3%)    |
|                   | 2. Diabetes                                                         | 4302 ( 27.60% )  |           |              |
| Cholestorol level | 1. No high cholesterol                                              | 5955 ( 41.80% )  |           | 1383 (8.9%)  |
|                   | 2. High cholesterol                                                 | 8283 ( 58.20% )  |           |              |
| MI/CHD            | 1. No myocardial infarctionor coronary heart disease                | 11873 ( 77.90% ) |           | 373 (2.4%)   |
|                   | 2. Stroke                                                           | 3375 ( 22.10% )  |           |              |
| Stroke            | 1. No stroke                                                        | 13305 ( 86.00% ) |           | 147 (0.9%)   |
|                   | 2. Stroke                                                           | 2169 ( 14.00% )  |           |              |
| Arthritis         | 1. No arthritis                                                     | 5718 ( 36.90% )  |           | 128 (0.8%)   |
|                   | 2. Arthritis                                                        | 9775 ( 63.10% )  |           |              |
| Depression        | 1. No depression                                                    | 8738 ( 56.50% )  |           | 144 (0.9%)   |
|                   | 2. Depression                                                       | 6739 ( 43.50% )  |           |              |
| Kidney disease    | 1. No kidney disease                                                | 14036 ( 90.70% ) |           | 142 (0.9%)   |
|                   | 2. Kidney disease                                                   | 1443 ( 9.30% )   |           |              |
| Obesity           | 1. < 30                                                             | 9237 ( 61.60% )  |           | 616 (3.9%)   |
|                   | 2. > 30                                                             | 5768 ( 38.40% )  |           |              |
| Blind             | 1. No blind or serious difficulty seeing, even with glasses         | 12860 ( 82.80% ) |           | 93 (0.6%)    |
|                   | 2. blind or serious difficulty seeing, even with glasses            | 2668 ( 17.20% )  |           |              |
| Deaf              | 1. No deaf or serious difficulty hearing                            | 11635 ( 75.00% ) |           | 108 (0.7%)   |
|                   | 2. deaf or serious difficulty hearing                               | 3878 ( 25.00% )  |           |              |
| Blind/deaf        | 1. No blind or serious difficulty hearing/seeing, even with glasses | 9944 ( 64.20% )  |           | 142 (0.9%)   |
|                   | 2. blind or serious difficulty hearing/seeing, even with glasses    | 5535 ( 35.80% )  |           |              |

|                       |                                             |                  |  |                  |
|-----------------------|---------------------------------------------|------------------|--|------------------|
| Asthma                | 1. Asthma                                   | 2964 ( 19.20% )  |  | 182 (1.2%)       |
|                       | 2. No Asthma                                | 12475 ( 80.80% ) |  |                  |
| COPD                  | 1. COPD, emphysema or chronic bronchitis    | 3603 ( 23.40% )  |  | 212 (1.4%)       |
|                       | 2. No COPD, emphysema or chronic bronchitis | 11806 ( 76.60% ) |  |                  |
| Asthma/COPD           | 1. Never asthmas/no COPD                    | 10209 ( 66.50% ) |  | 261 (1.7%)       |
|                       | 2. Former/current asthmas/CO                | 5151 ( 33.50% )  |  |                  |
| Skin cancer           | 1. No skin cancer                           | 12849 ( 82.80% ) |  | 102 (0.7%)       |
|                       | 2. Skin cancer                              | 2670 ( 17.20% )  |  |                  |
| Other Cancer          | 1. No other cancers                         | 12624 ( 81.30% ) |  | 93 (0.6%)        |
|                       | 2. Other cancers                            | 2904 ( 18.70% )  |  |                  |
| Cancer                | 1. No Cancer                                | 10683 ( 69.00% ) |  | 143 (0.9%)       |
|                       | 2. Cancer                                   | 4795 ( 31.00% )  |  |                  |
| Hepatitis C           | 1. No hepatitis C                           | 2206 ( 95.90% )  |  | 13320<br>(85.3%) |
|                       | 2. hepatitis C                              | 95 ( 4.10% )     |  |                  |
| Hepatitis B           | 1. No hepatitis B                           | 2241 ( 97.80% )  |  | 13330<br>(85.3%) |
|                       | 2. hepatitis B                              | 50 ( 2.20% )     |  |                  |
| Hepatitis             | 1. No hepatitis                             | 2166 ( 94.50% )  |  | 13329<br>(85.3%) |
|                       | 2. Hepatitis                                | 126 ( 5.50% )    |  |                  |
| Smoke status          | 1. Never smoke                              | 2322 ( 15.00% )  |  | 109 (0.7%)       |
|                       | 2. Former smoker                            | 818 ( 5.30% )    |  |                  |
|                       | 3. Current smoker, smokes so                | 5726 ( 36.90% )  |  |                  |
|                       | 4. Current smoker, smokes ev                | 6646 ( 42.80% )  |  |                  |
| Heavy drinker         | 1. Not heavy drinker                        | 14511 ( 94.80% ) |  | 312 (2.0%)       |
|                       | 2. Heavy drinker                            | 798 ( 5.20% )    |  |                  |
| Physical exercise     | 1. No physical activity/exer                | 6583 ( 42.20% )  |  | 38 (0.2%)        |
|                       | 2. Physical activity/exercis                | 9000 ( 57.80% )  |  |                  |
| Fruit ≥ 1 per day     | 1. No fruit consumption                     | 6261 ( 41.70% )  |  | 611 (3.9%)       |
|                       | 2. At least once fruit consu                | 8749 ( 58.30% )  |  |                  |
| Vegetable ≥ 1 per day | 1. No vegetable consumption                 | 3524 ( 24.00% )  |  | 939 (6.0%)       |
|                       | 2. At least once vegetable c                | 11158 ( 76.00% ) |  |                  |
| Funtional impairment  | 1. No funtional limitations                 | 5652 ( 37.10% )  |  | 382 (2.4%)       |
|                       | 2. Funtional limitations                    | 9587 ( 62.90% )  |  |                  |

Appendix 2: Correlation matrix of variables for latent class analysis

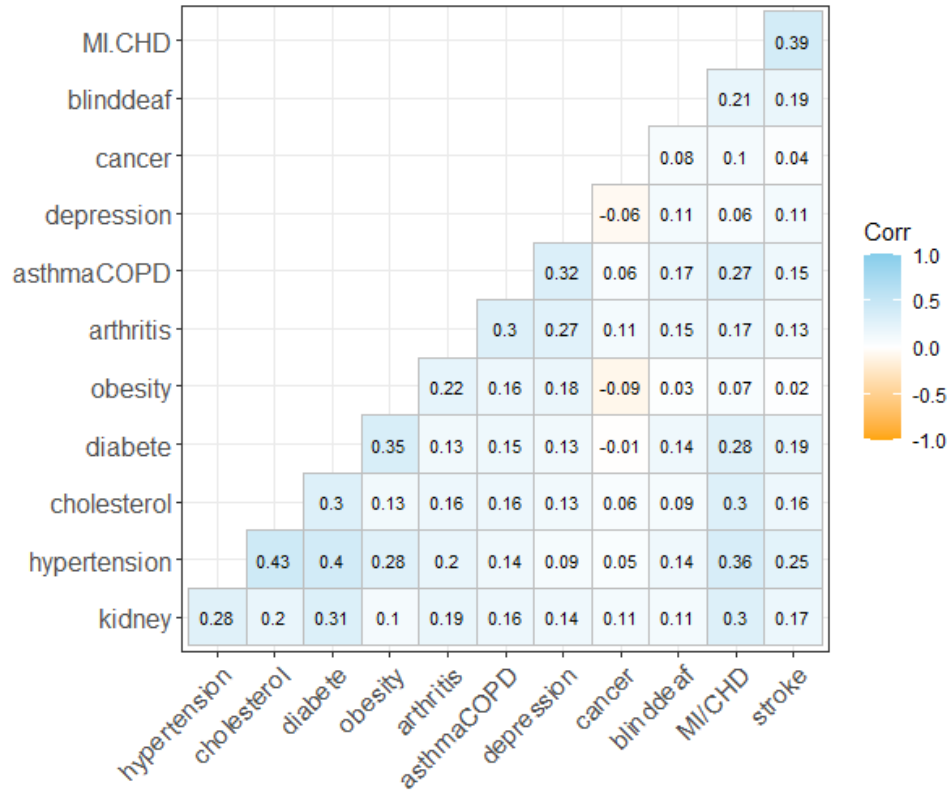

### Appendix 3: Assessment of inverse probability of treatment weighting method

Figure 1: Absolute Standardized Difference in Unweighted and Weighted Means and Proportions in Each Pair of the Groups on Imputed Data 1

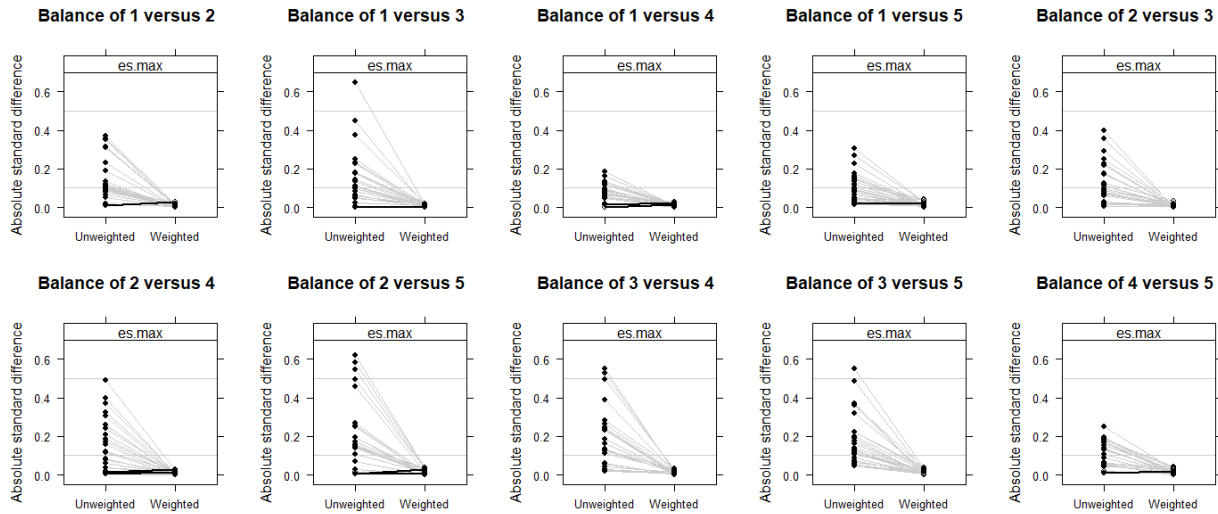

Figure 2: Absolute Standardized Difference in Unweighted and Weighted Means and Proportions in Each Pair of the Groups on Imputed Data 2

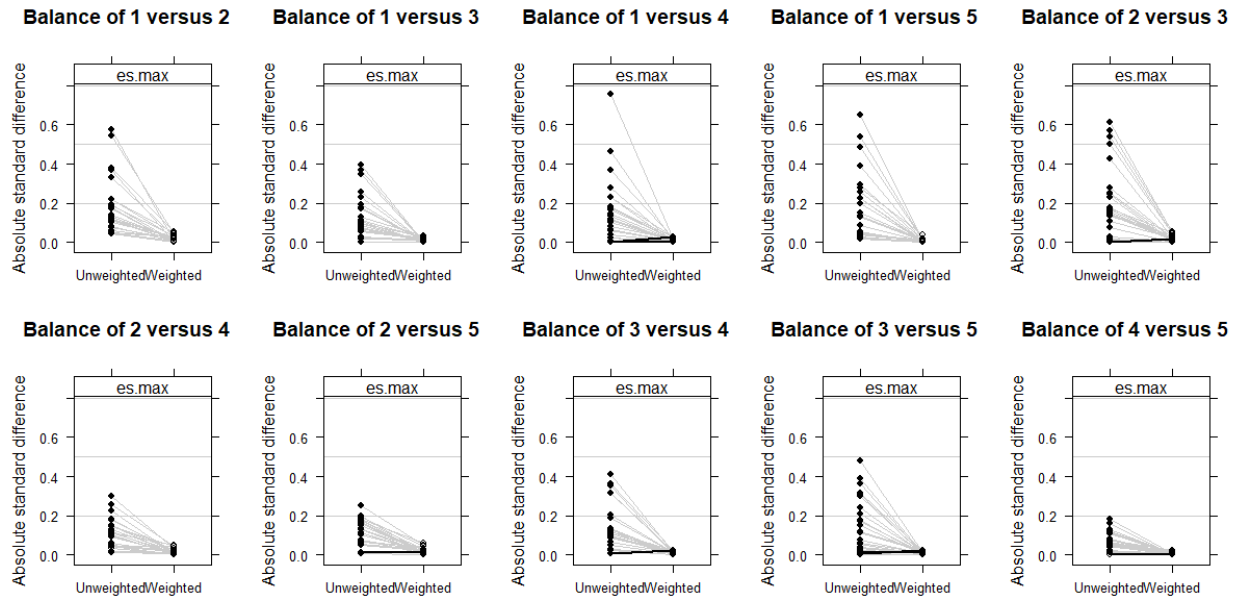

Figure 3: Absolute Standardized Difference in Unweighted and Weighted Means and Proportions in Each Pair of the Groups on Imputed Data 3

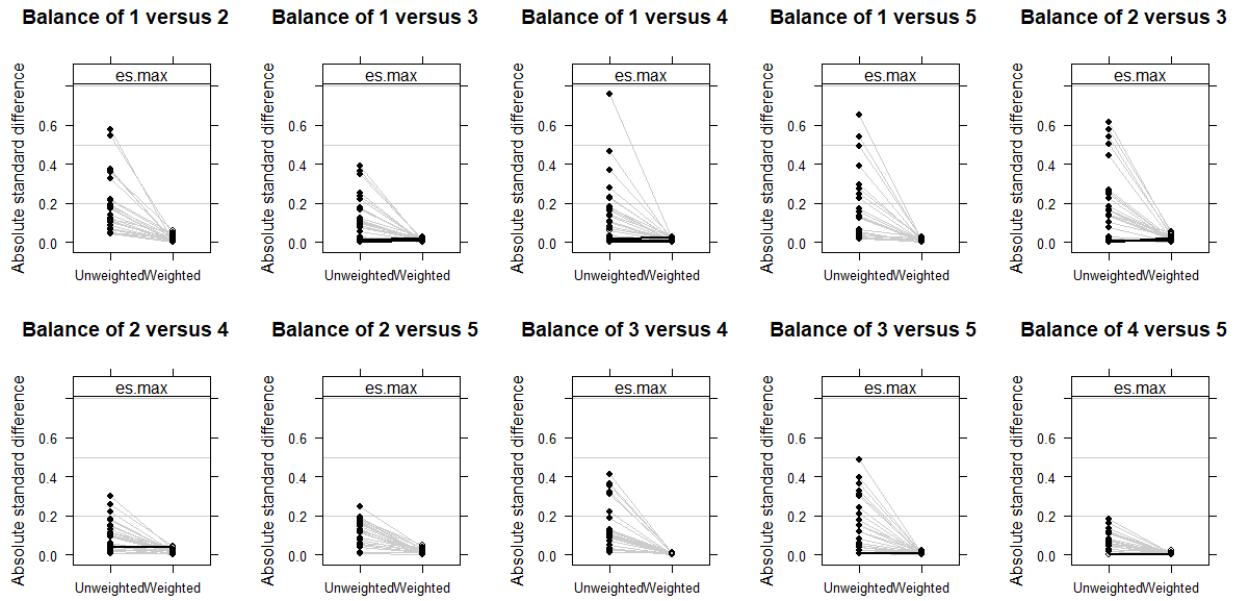

Figure 4: Absolute Standardized Difference in Unweighted and Weighted Means and Proportions in Each Pair of the Groups on Imputed Data 4

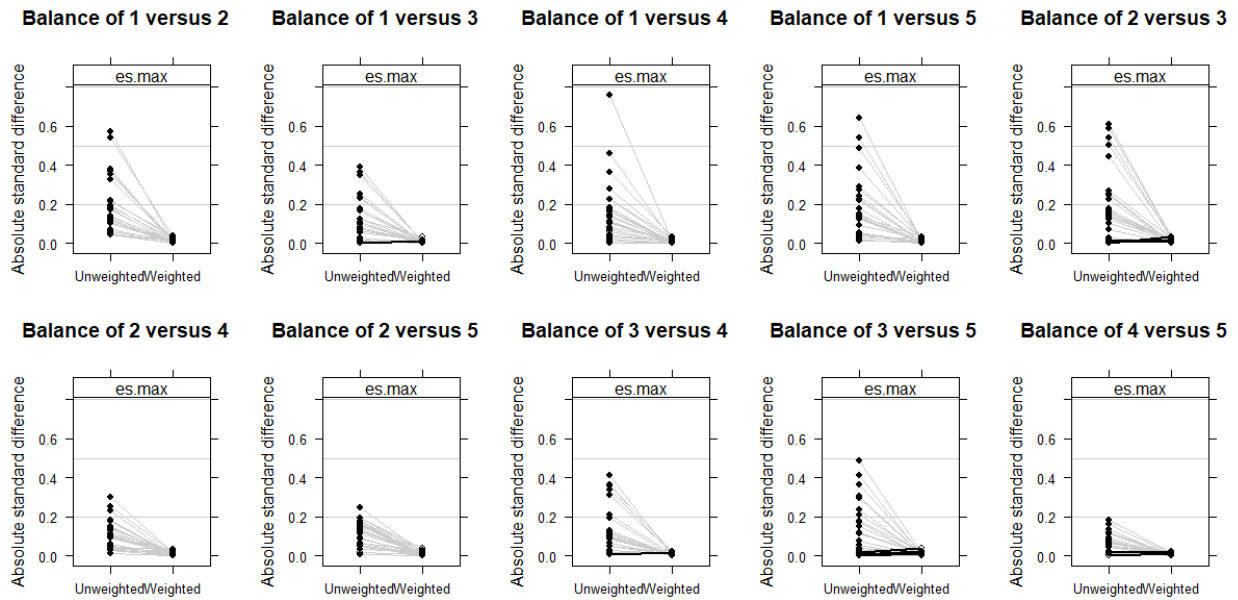

Figure 5: Absolute Standardized Difference in Unweighted and Weighted Means and Proportions in Each Pair of the Groups on Imputed Data 5

## Proportions in Each Pair of the Groups on Imputed Data 5

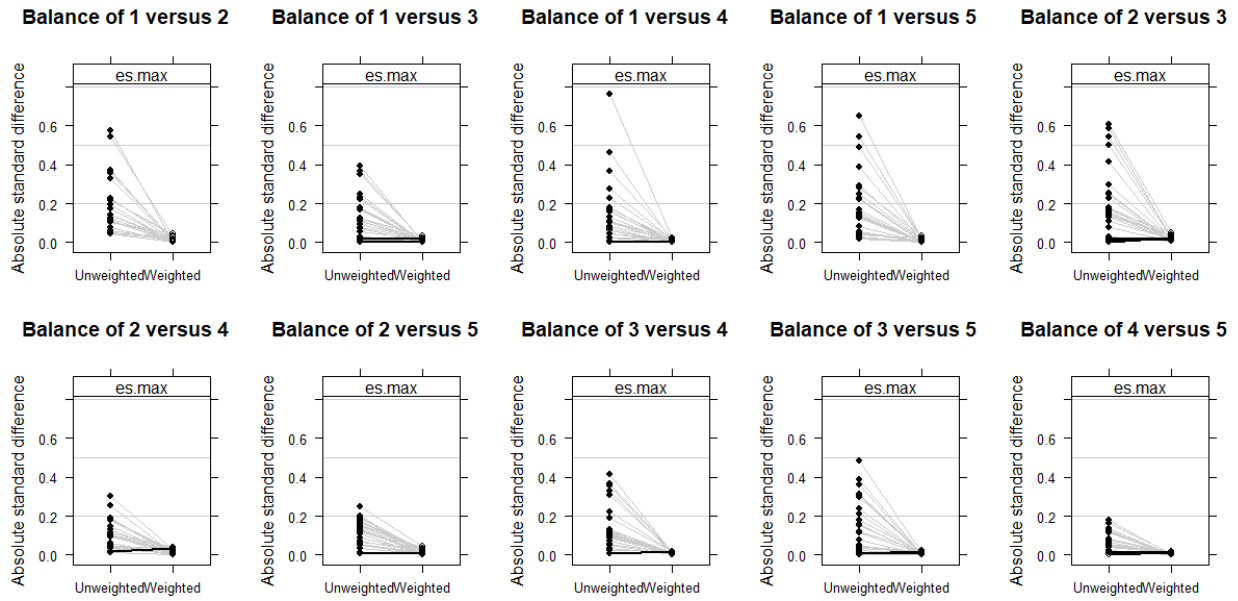

Figure 6: Absolute Standardized Difference in Unweighted and Weighted Means and

## Proportions in Each Pair of the Groups on Imputed Data 6

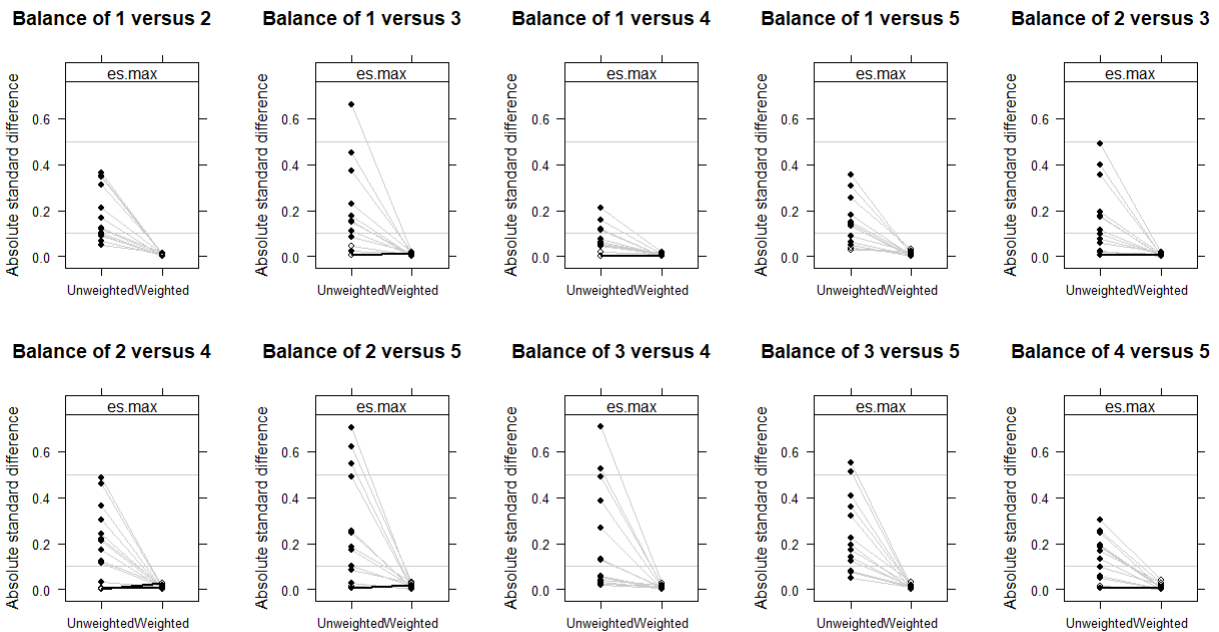

Figure 7: Absolute Standardized Difference in Unweighted and Weighted Means and

## Proportions in Each Pair of the Groups on Imputed Data 7

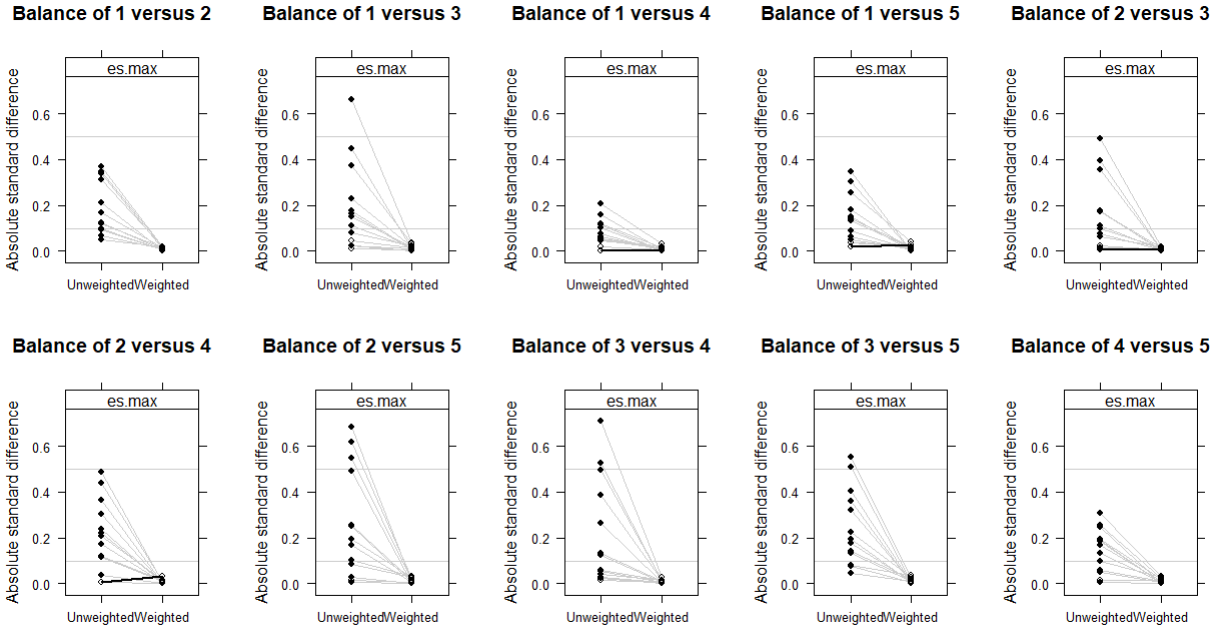

Figure 8: Absolute Standardized Difference in Unweighted and Weighted Means and Proportions in Each Pair of the Groups on Imputed Data 8

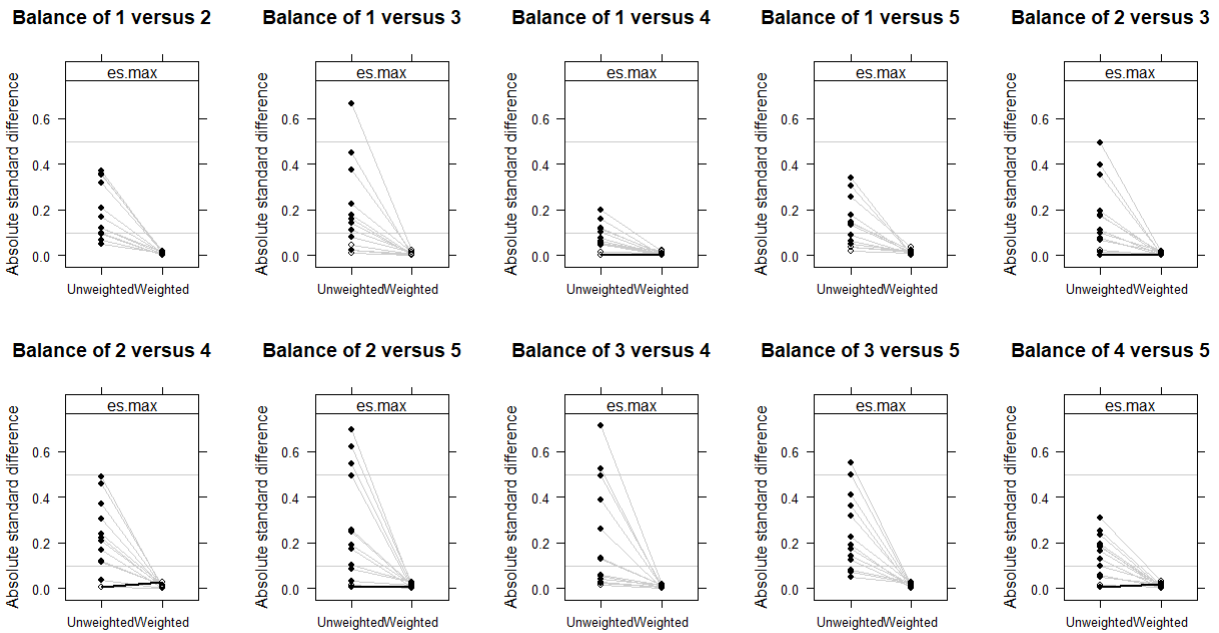

Figure 9: Absolute Standardized Difference in Unweighted and Weighted Means and Proportions in Each Pair of the Groups on Imputed Data 9



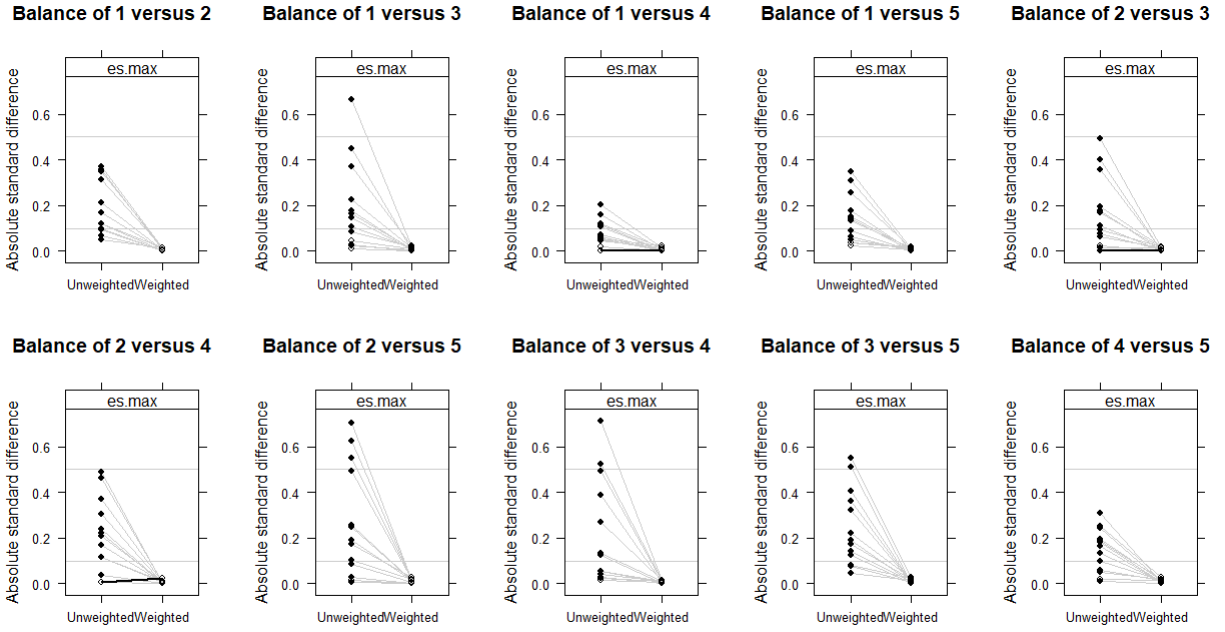

Figure 10: Absolute Standardized Difference in Unweighted and Weighted Means and Proportions in Each Pair of the Groups on Imputed Data 10

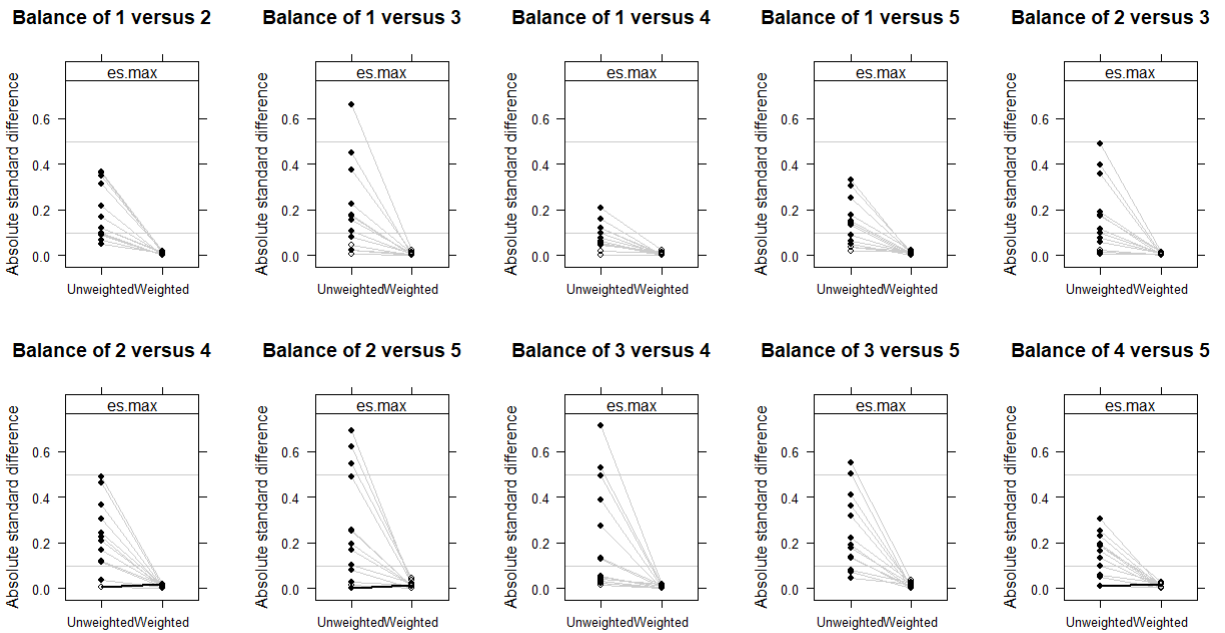

Figure 11: Absolute Standardized Difference in Unweighted and Weighted Means and Proportions in Each Pair of the Groups on Imputed Data 11

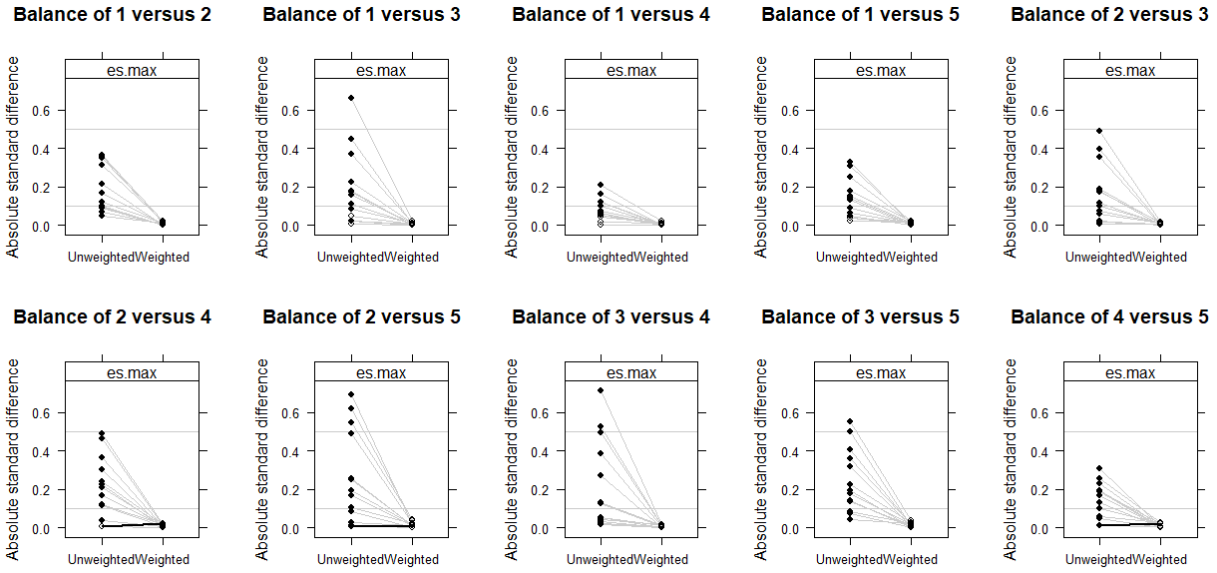

Figure 12: Absolute Standardized Difference in Unweighted and Weighted Means and Proportions in Each Pair of the Groups on Imputed Data 12

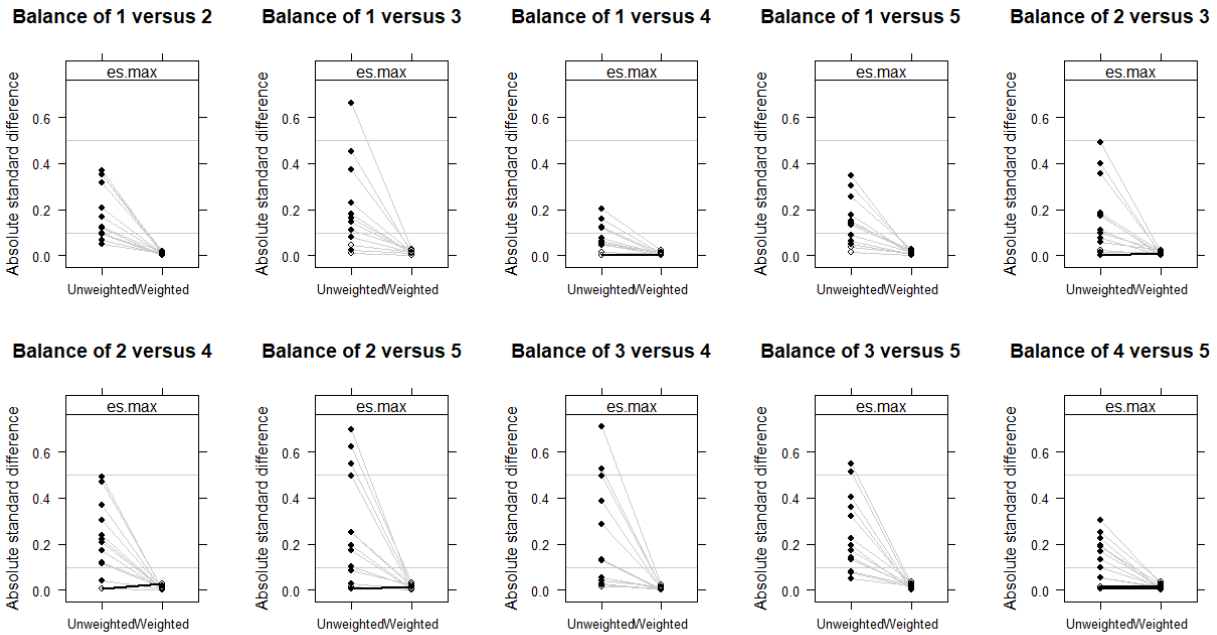

Figure 13: Absolute Standardized Difference in Unweighted and Weighted Means and Proportions in Each Pair of the Groups on Imputed Data 13

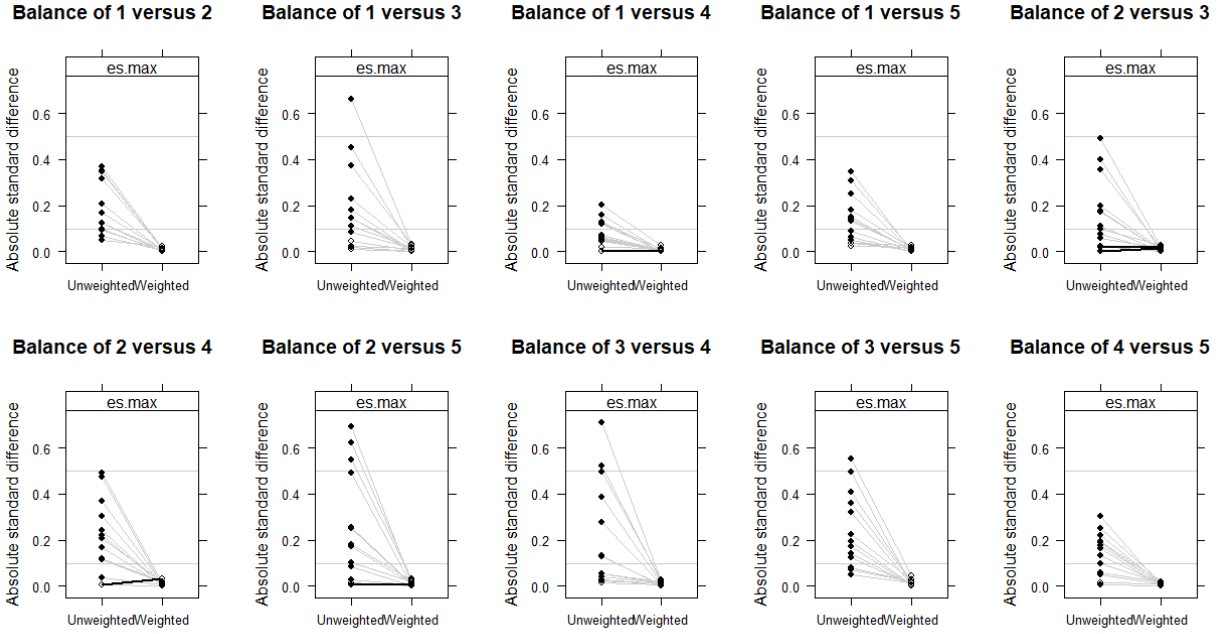

Figure 14: Absolute Standardized Difference in Unweighted and Weighted Means and Proportions in Each Pair of the Groups on Imputed Data 14

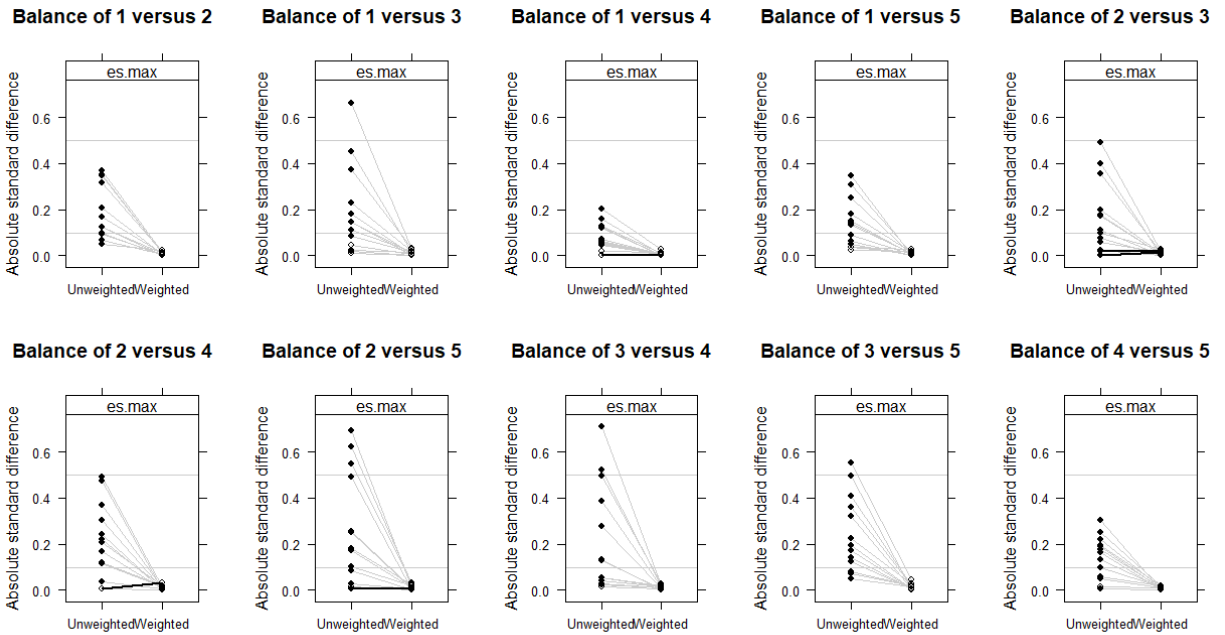

Figure 15: Absolute Standardized Difference in Unweighted and Weighted Means and Proportions in Each Pair of the Groups on Imputed Data 15

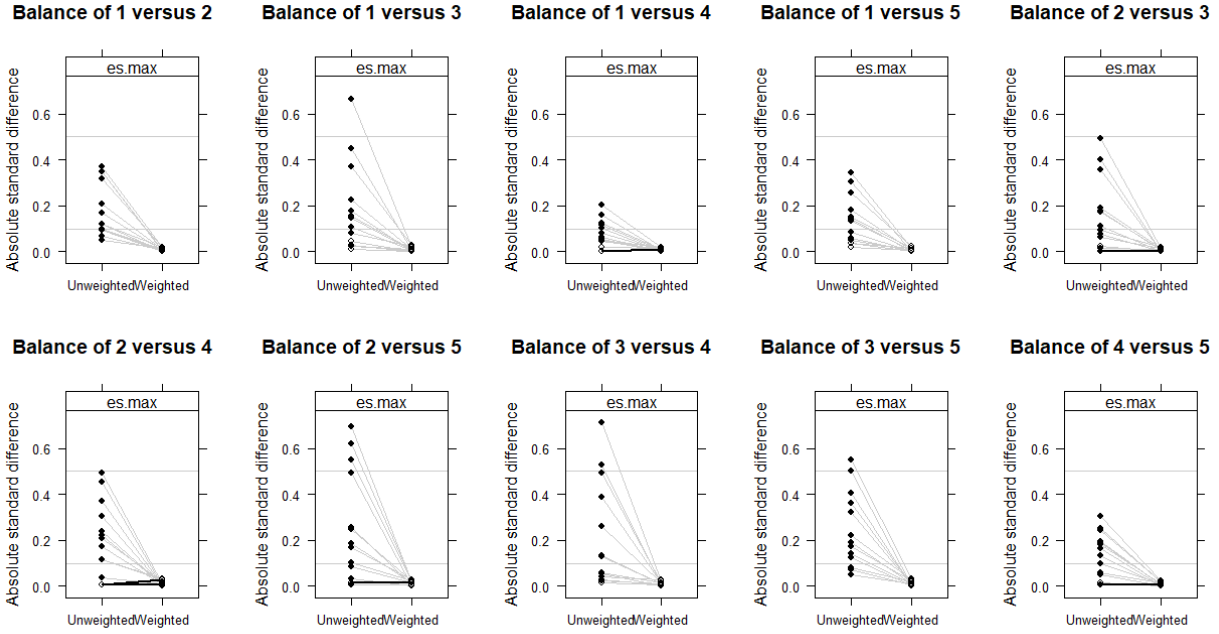

Figure 16: Absolute Standardized Difference in Unweighted and Weighted Means and Proportions in Each Pair of the Groups on Imputed Data 16

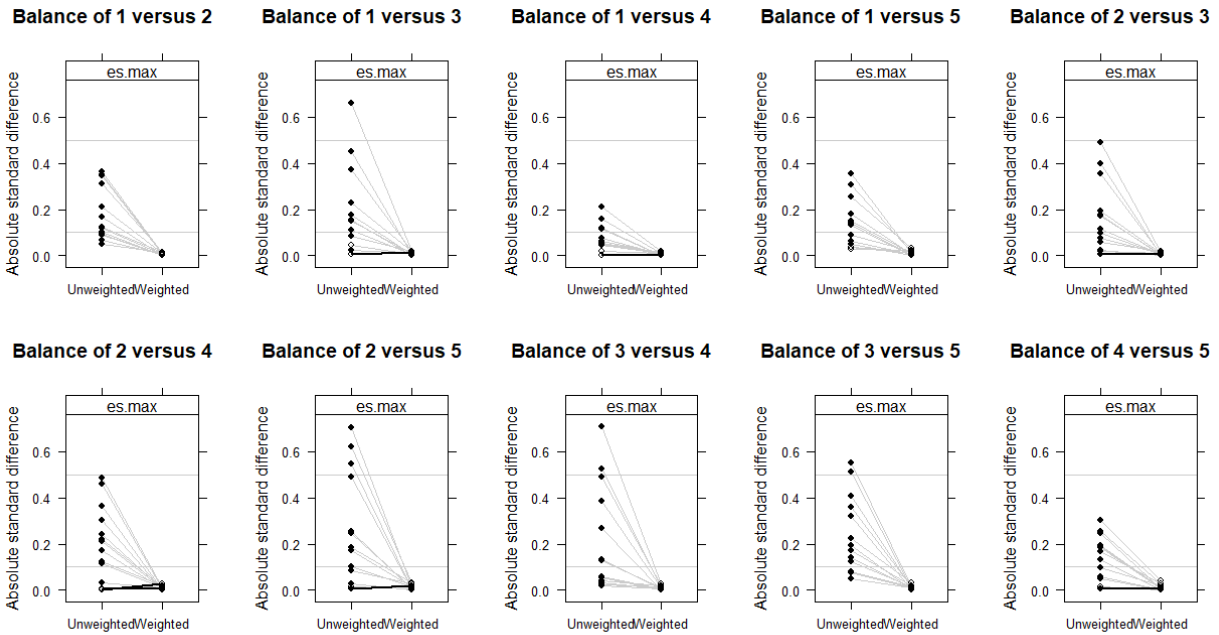

Figure 17: Absolute Standardized Difference in Unweighted and Weighted Means and Proportions in Each Pair of the Groups on Imputed Data 17

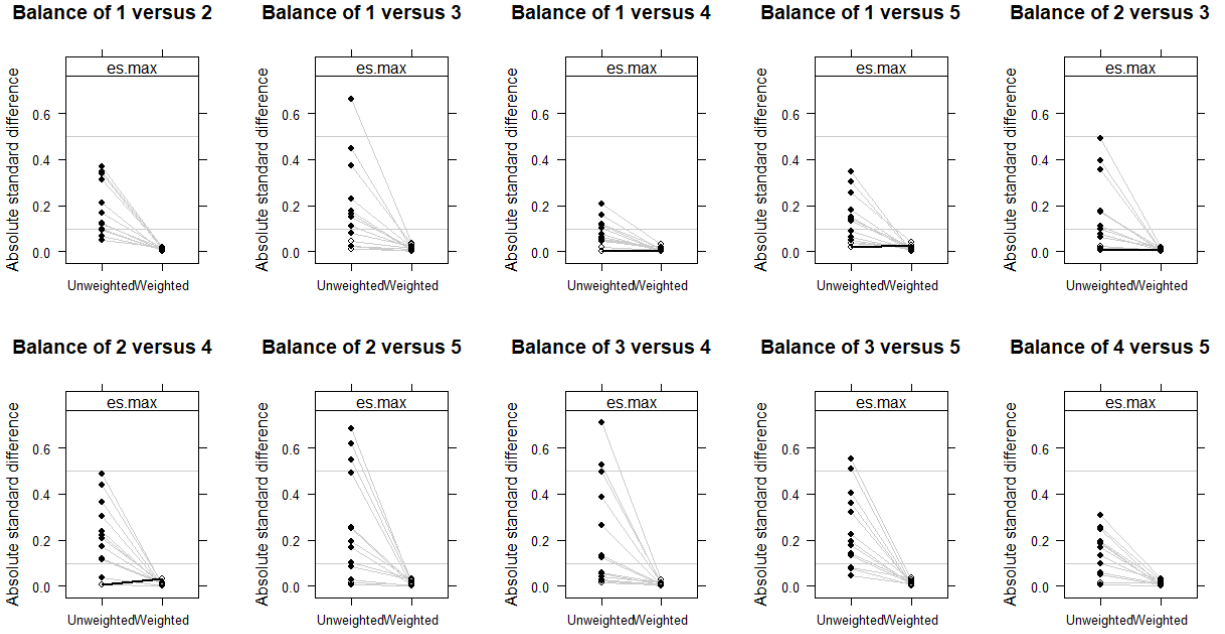

Figure 18: Absolute Standardized Difference in Unweighted and Weighted Means and Proportions in Each Pair of the Groups on Imputed Data 18

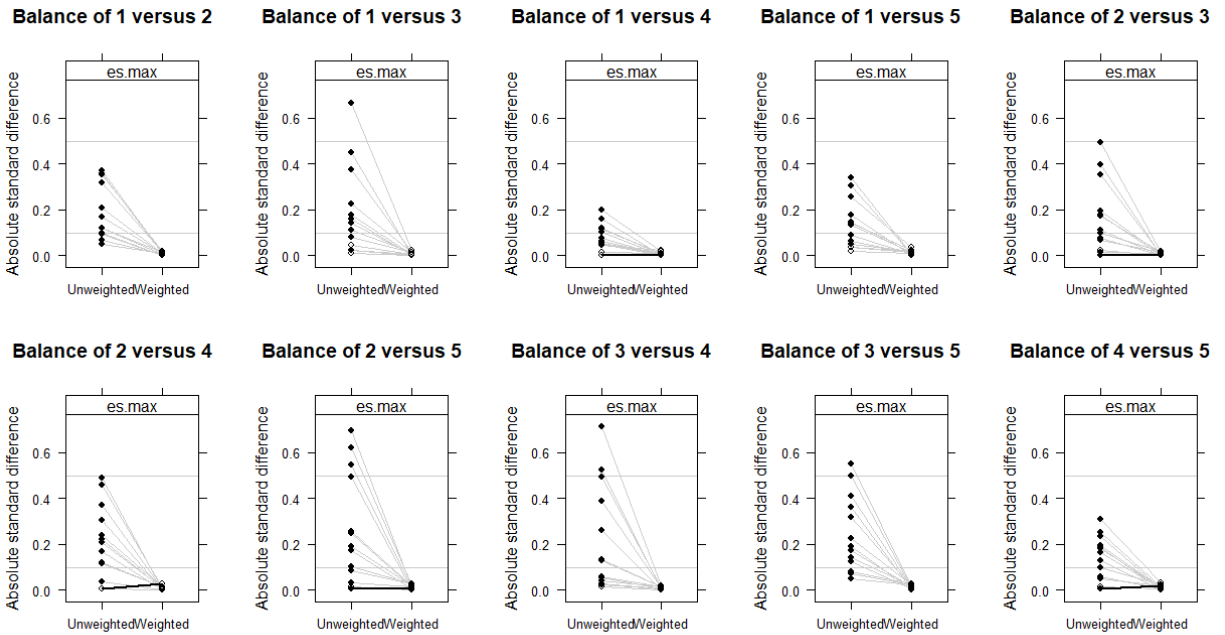

Figure 19: Absolute Standardized Difference in Unweighted and Weighted Means and Proportions in Each Pair of the Groups on Imputed Data 19

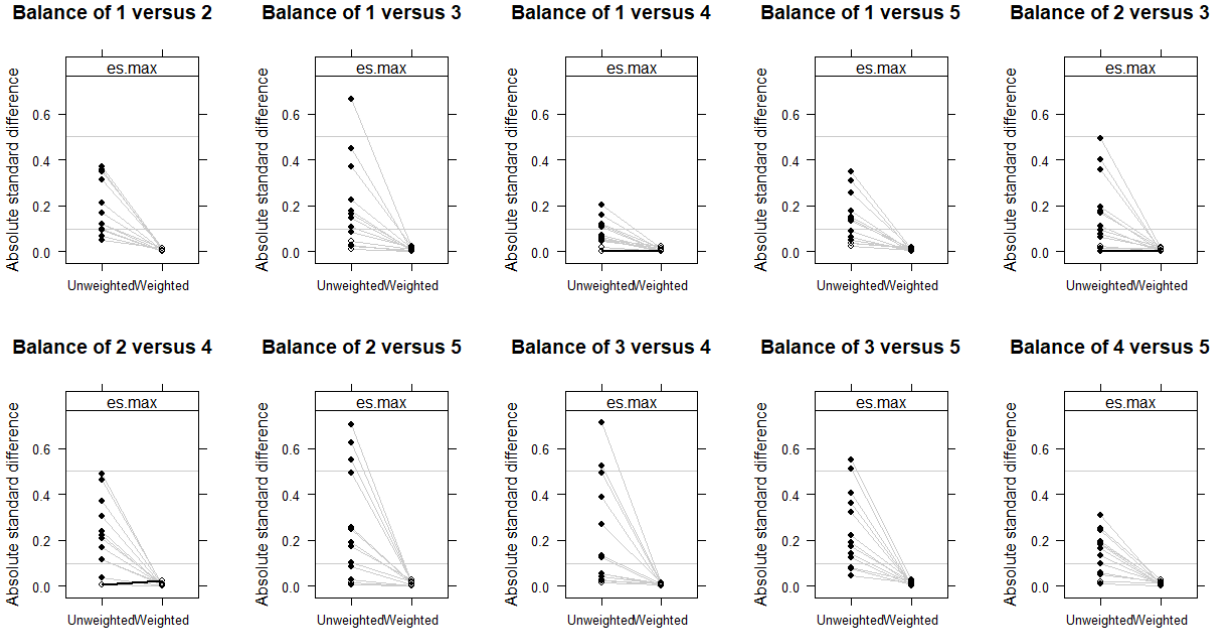

Figure 20: Absolute Standardized Difference in Unweighted and Weighted Means and Proportions in Each Pair of the Groups on Imputed Data 20

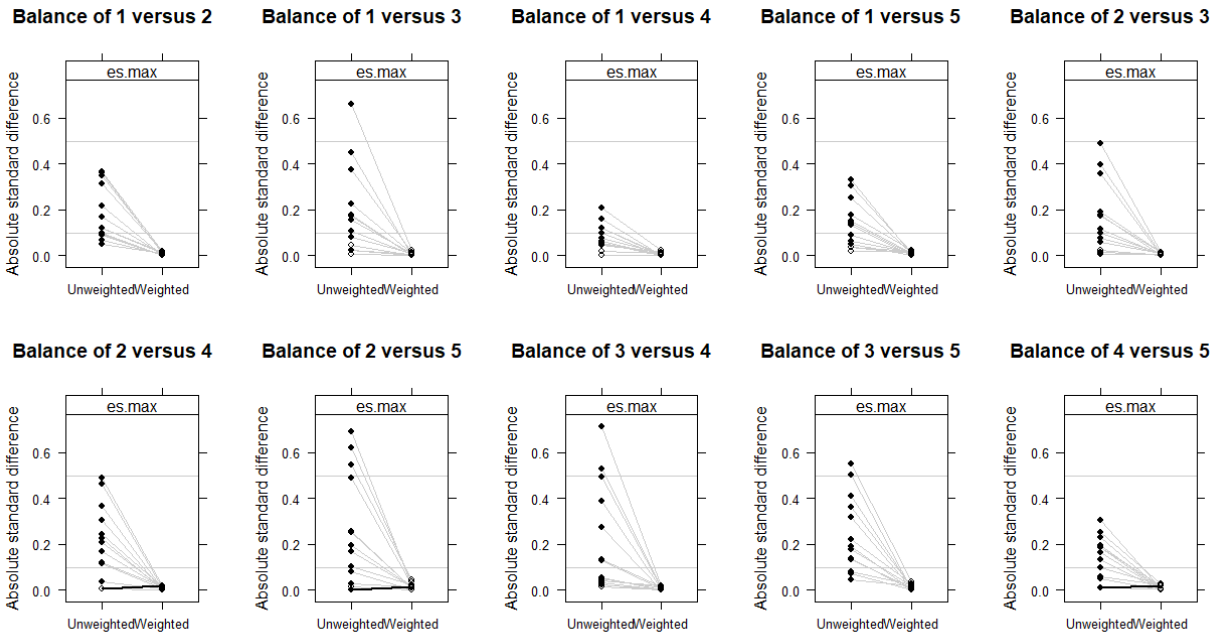

Table 1: Summary statistics of estimated propensity score from GBM

|              |         | class1 | class2 | class3 | class4 | class5 |
|--------------|---------|--------|--------|--------|--------|--------|
| Imputation 1 | Minimum | 0.028  | 0.076  | 0.028  | 0.004  | 0.001  |

|              |                    |       |       |       |       |       |
|--------------|--------------------|-------|-------|-------|-------|-------|
|              | 1st Quintile       | 0.144 | 0.174 | 0.137 | 0.100 | 0.064 |
|              | Median             | 0.193 | 0.258 | 0.201 | 0.151 | 0.118 |
|              | Mean               | 0.188 | 0.276 | 0.224 | 0.177 | 0.135 |
|              | 3rd Quintile       | 0.238 | 0.338 | 0.308 | 0.230 | 0.186 |
|              | Maximum            | 0.646 | 0.785 | 0.618 | 0.731 | 0.839 |
|              | Standard deviation | 0.069 | 0.125 | 0.106 | 0.104 | 0.094 |
| Imputation 2 | Minimum            | 0.038 | 0.059 | 0.033 | 0.010 | 0.001 |
|              | 1st Quintile       | 0.143 | 0.177 | 0.137 | 0.103 | 0.063 |
|              | Median             | 0.195 | 0.249 | 0.196 | 0.153 | 0.116 |
|              | Mean               | 0.188 | 0.276 | 0.224 | 0.177 | 0.135 |
|              | 3rd Quintile       | 0.231 | 0.343 | 0.310 | 0.227 | 0.185 |
|              | Maximum            | 0.675 | 0.756 | 0.649 | 0.701 | 0.741 |
|              | Standard deviation | 0.068 | 0.125 | 0.106 | 0.098 | 0.095 |
| Imputation 3 | Minimum            | 0.049 | 0.068 | 0.037 | 0.005 | 0.000 |
|              | 1st Quintile       | 0.152 | 0.180 | 0.138 | 0.101 | 0.063 |
|              | Median             | 0.197 | 0.260 | 0.196 | 0.151 | 0.122 |
|              | Mean               | 0.189 | 0.277 | 0.224 | 0.177 | 0.135 |
|              | 3rd Quintile       | 0.230 | 0.348 | 0.311 | 0.226 | 0.185 |
|              | Maximum            | 0.535 | 0.778 | 0.621 | 0.760 | 0.869 |
|              | Standard deviation | 0.064 | 0.123 | 0.105 | 0.102 | 0.095 |
| Imputation 4 | Minimum            | 0.033 | 0.063 | 0.034 | 0.003 | 0.001 |
|              | 1st Quintile       | 0.146 | 0.179 | 0.134 | 0.096 | 0.064 |
|              | Median             | 0.194 | 0.253 | 0.194 | 0.149 | 0.114 |
|              | Mean               | 0.189 | 0.275 | 0.224 | 0.177 | 0.135 |
|              | 3rd Quintile       | 0.235 | 0.335 | 0.307 | 0.230 | 0.185 |
|              | Maximum            | 0.496 | 0.797 | 0.555 | 0.727 | 0.712 |
|              | Standard deviation | 0.067 | 0.124 | 0.106 | 0.105 | 0.095 |
| Imputation 5 | Minimum            | 0.038 | 0.078 | 0.032 | 0.014 | 0.001 |
|              | 1st Quintile       | 0.153 | 0.176 | 0.136 | 0.110 | 0.062 |
|              | Median             | 0.200 | 0.261 | 0.196 | 0.154 | 0.116 |
|              | Mean               | 0.189 | 0.276 | 0.224 | 0.177 | 0.135 |
|              | 3rd Quintile       | 0.234 | 0.343 | 0.305 | 0.221 | 0.187 |
|              | Maximum            | 0.597 | 0.754 | 0.630 | 0.660 | 0.774 |
|              | Standard deviation | 0.064 | 0.124 | 0.108 | 0.093 | 0.096 |
| Imputation 6 | Minimum            | 0.038 | 0.046 | 0.029 | 0.014 | 0.000 |
|              | 1st Quintile       | 0.148 | 0.177 | 0.137 | 0.110 | 0.064 |
|              | Median             | 0.197 | 0.259 | 0.196 | 0.153 | 0.117 |

|               |                    |       |       |       |       |       |
|---------------|--------------------|-------|-------|-------|-------|-------|
|               | Mean               | 0.189 | 0.276 | 0.224 | 0.177 | 0.135 |
|               | 3rd Quintile       | 0.231 | 0.347 | 0.314 | 0.221 | 0.184 |
|               | Maximum            | 0.542 | 0.770 | 0.615 | 0.636 | 0.889 |
|               | Standard deviation | 0.066 | 0.126 | 0.108 | 0.094 | 0.098 |
| Imputation 7  | Minimum            | 0.041 | 0.056 | 0.006 | 0.011 | 0.001 |
|               | 1st Quintile       | 0.147 | 0.178 | 0.120 | 0.107 | 0.062 |
|               | Median             | 0.201 | 0.257 | 0.199 | 0.151 | 0.114 |
|               | Mean               | 0.189 | 0.275 | 0.223 | 0.177 | 0.135 |
|               | 3rd Quintile       | 0.232 | 0.342 | 0.311 | 0.223 | 0.188 |
|               | Maximum            | 0.597 | 0.774 | 0.853 | 0.640 | 0.837 |
|               | Standard deviation | 0.064 | 0.128 | 0.125 | 0.096 | 0.100 |
| Imputation 8  | Minimum            | 0.051 | 0.059 | 0.030 | 0.016 | 0.001 |
|               | 1st Quintile       | 0.149 | 0.179 | 0.138 | 0.106 | 0.061 |
|               | Median             | 0.199 | 0.249 | 0.197 | 0.150 | 0.117 |
|               | Mean               | 0.189 | 0.275 | 0.224 | 0.177 | 0.135 |
|               | 3rd Quintile       | 0.229 | 0.337 | 0.306 | 0.224 | 0.187 |
|               | Maximum            | 0.552 | 0.819 | 0.628 | 0.674 | 0.717 |
|               | Standard deviation | 0.062 | 0.127 | 0.107 | 0.097 | 0.095 |
| Imputation 9  | Minimum            | 0.033 | 0.060 | 0.036 | 0.013 | 0.001 |
|               | 1st Quintile       | 0.144 | 0.183 | 0.135 | 0.107 | 0.063 |
|               | Median             | 0.194 | 0.251 | 0.197 | 0.152 | 0.115 |
|               | Mean               | 0.188 | 0.276 | 0.223 | 0.178 | 0.134 |
|               | 3rd Quintile       | 0.233 | 0.339 | 0.311 | 0.224 | 0.181 |
|               | Maximum            | 0.583 | 0.815 | 0.593 | 0.703 | 0.771 |
|               | Standard deviation | 0.069 | 0.122 | 0.107 | 0.100 | 0.096 |
| Imputation 10 | Minimum            | 0.041 | 0.052 | 0.043 | 0.011 | 0.002 |
|               | 1st Quintile       | 0.148 | 0.178 | 0.138 | 0.105 | 0.061 |
|               | Median             | 0.198 | 0.253 | 0.199 | 0.154 | 0.122 |
|               | Mean               | 0.189 | 0.275 | 0.224 | 0.177 | 0.135 |
|               | 3rd Quintile       | 0.231 | 0.340 | 0.310 | 0.224 | 0.188 |
|               | Maximum            | 0.579 | 0.817 | 0.545 | 0.674 | 0.767 |
|               | Standard deviation | 0.066 | 0.127 | 0.104 | 0.098 | 0.093 |
| Imputation 11 | Minimum            | 0.034 | 0.047 | 0.029 | 0.011 | 0.001 |
|               | 1st Quintile       | 0.151 | 0.183 | 0.137 | 0.105 | 0.068 |
|               | Median             | 0.200 | 0.253 | 0.202 | 0.152 | 0.116 |
|               | Mean               | 0.189 | 0.276 | 0.223 | 0.177 | 0.135 |
|               | 3rd Quintile       | 0.229 | 0.338 | 0.312 | 0.226 | 0.182 |



|                  |                    |       |       |       |       |       |
|------------------|--------------------|-------|-------|-------|-------|-------|
|                  | Maximum            | 0.635 | 0.834 | 0.606 | 0.646 | 0.860 |
|                  | Standard deviation | 0.067 | 0.126 | 0.105 | 0.097 | 0.093 |
| Imputation<br>12 | Minimum            | 0.037 | 0.061 | 0.031 | 0.011 | 0.000 |
|                  | 1st Quintile       | 0.140 | 0.182 | 0.133 | 0.104 | 0.062 |
|                  | Median             | 0.192 | 0.257 | 0.199 | 0.152 | 0.116 |
|                  | Mean               | 0.188 | 0.276 | 0.224 | 0.178 | 0.135 |
|                  | 3rd Quintile       | 0.236 | 0.348 | 0.311 | 0.226 | 0.183 |
|                  | Maximum            | 0.674 | 0.798 | 0.551 | 0.716 | 0.759 |
|                  | Standard deviation | 0.071 | 0.124 | 0.107 | 0.100 | 0.098 |
| Imputation<br>13 | Minimum            | 0.044 | 0.074 | 0.039 | 0.006 | 0.001 |
|                  | 1st Quintile       | 0.145 | 0.177 | 0.137 | 0.106 | 0.058 |
|                  | Median             | 0.199 | 0.254 | 0.201 | 0.152 | 0.116 |
|                  | Mean               | 0.189 | 0.276 | 0.224 | 0.177 | 0.135 |
|                  | 3rd Quintile       | 0.231 | 0.342 | 0.309 | 0.227 | 0.187 |
|                  | Maximum            | 0.462 | 0.797 | 0.574 | 0.704 | 0.899 |
|                  | Standard deviation | 0.061 | 0.125 | 0.107 | 0.099 | 0.099 |
| Imputation<br>14 | Minimum            | 0.038 | 0.055 | 0.037 | 0.003 | 0.000 |
|                  | 1st Quintile       | 0.153 | 0.176 | 0.134 | 0.097 | 0.059 |
|                  | Median             | 0.201 | 0.255 | 0.196 | 0.149 | 0.119 |
|                  | Mean               | 0.189 | 0.275 | 0.223 | 0.177 | 0.136 |
|                  | 3rd Quintile       | 0.233 | 0.348 | 0.311 | 0.231 | 0.187 |
|                  | Maximum            | 0.511 | 0.809 | 0.592 | 0.788 | 0.808 |
|                  | Standard deviation | 0.063 | 0.124 | 0.107 | 0.107 | 0.101 |
| Imputation<br>15 | Minimum            | 0.035 | 0.066 | 0.029 | 0.016 | 0.001 |
|                  | 1st Quintile       | 0.143 | 0.180 | 0.138 | 0.110 | 0.062 |
|                  | Median             | 0.198 | 0.263 | 0.200 | 0.151 | 0.116 |
|                  | Mean               | 0.189 | 0.277 | 0.223 | 0.177 | 0.135 |
|                  | 3rd Quintile       | 0.234 | 0.347 | 0.312 | 0.222 | 0.188 |
|                  | Maximum            | 0.513 | 0.791 | 0.655 | 0.619 | 0.766 |
|                  | Standard deviation | 0.066 | 0.123 | 0.106 | 0.091 | 0.092 |
| Imputation<br>16 | Minimum            | 0.016 | 0.062 | 0.035 | 0.004 | 0.001 |
|                  | 1st Quintile       | 0.139 | 0.184 | 0.139 | 0.099 | 0.061 |
|                  | Median             | 0.193 | 0.252 | 0.196 | 0.150 | 0.115 |
|                  | Mean               | 0.188 | 0.276 | 0.224 | 0.177 | 0.136 |
|                  | 3rd Quintile       | 0.233 | 0.341 | 0.311 | 0.223 | 0.182 |
|                  | Maximum            | 0.671 | 0.780 | 0.567 | 0.778 | 0.851 |
|                  | Standard deviation | 0.071 | 0.125 | 0.107 | 0.105 | 0.099 |

|                  |                    |       |       |       |       |       |
|------------------|--------------------|-------|-------|-------|-------|-------|
| Imputation<br>17 | Minimum            | 0.048 | 0.053 | 0.046 | 0.009 | 0.000 |
|                  | 1st Quintile       | 0.155 | 0.182 | 0.132 | 0.104 | 0.060 |
|                  | Median             | 0.202 | 0.256 | 0.197 | 0.150 | 0.116 |
|                  | Mean               | 0.189 | 0.276 | 0.224 | 0.177 | 0.136 |
|                  | 3rd Quintile       | 0.228 | 0.337 | 0.313 | 0.226 | 0.186 |
|                  | Maximum            | 0.461 | 0.785 | 0.526 | 0.727 | 0.795 |
|                  | Standard deviation | 0.060 | 0.123 | 0.106 | 0.102 | 0.101 |
| Imputation<br>18 | Minimum            | 0.045 | 0.045 | 0.035 | 0.004 | 0.000 |
|                  | 1st Quintile       | 0.148 | 0.181 | 0.138 | 0.098 | 0.060 |
|                  | Median             | 0.200 | 0.251 | 0.201 | 0.152 | 0.116 |
|                  | Mean               | 0.189 | 0.275 | 0.224 | 0.177 | 0.135 |
|                  | 3rd Quintile       | 0.231 | 0.331 | 0.309 | 0.224 | 0.184 |
|                  | Maximum            | 0.590 | 0.823 | 0.565 | 0.779 | 0.888 |
|                  | Standard deviation | 0.063 | 0.127 | 0.107 | 0.105 | 0.098 |
| Imputation<br>19 | Minimum            | 0.040 | 0.060 | 0.032 | 0.006 | 0.002 |
|                  | 1st Quintile       | 0.151 | 0.177 | 0.136 | 0.101 | 0.065 |
|                  | Median             | 0.198 | 0.259 | 0.194 | 0.148 | 0.121 |
|                  | Mean               | 0.189 | 0.276 | 0.223 | 0.178 | 0.135 |
|                  | 3rd Quintile       | 0.231 | 0.344 | 0.308 | 0.228 | 0.187 |
|                  | Maximum            | 0.561 | 0.788 | 0.607 | 0.809 | 0.790 |
|                  | Standard deviation | 0.064 | 0.124 | 0.107 | 0.105 | 0.091 |
| Imputation<br>20 | Minimum            | 0.039 | 0.047 | 0.030 | 0.006 | 0.001 |
|                  | 1st Quintile       | 0.145 | 0.178 | 0.135 | 0.103 | 0.064 |
|                  | Median             | 0.197 | 0.258 | 0.197 | 0.150 | 0.118 |
|                  | Mean               | 0.189 | 0.276 | 0.224 | 0.177 | 0.135 |
|                  | 3rd Quintile       | 0.230 | 0.347 | 0.313 | 0.225 | 0.185 |
|                  | Maximum            | 0.581 | 0.813 | 0.584 | 0.741 | 0.727 |
|                  | Standard deviation | 0.067 | 0.127 | 0.106 | 0.102 | 0.094 |

Appendix 4:

Table 1: Classification Diagnostics of the 5-class LCA Model

| Predicted class            | AvePP | OCC   |
|----------------------------|-------|-------|
| Age associated             | 0.62  | 5.64  |
| Severely impaired          | 0.70  | 13.89 |
| Minimal chronic conditions | 0.74  | 8.07  |
| Obesity/diabetes           | 0.60  | 6.80  |
| Respiratory/depression     | 0.61  | 6.80  |

Figure 1: Boxplot of Estimated Propensity Scores in the Five Groups on the 20 Imputed Data

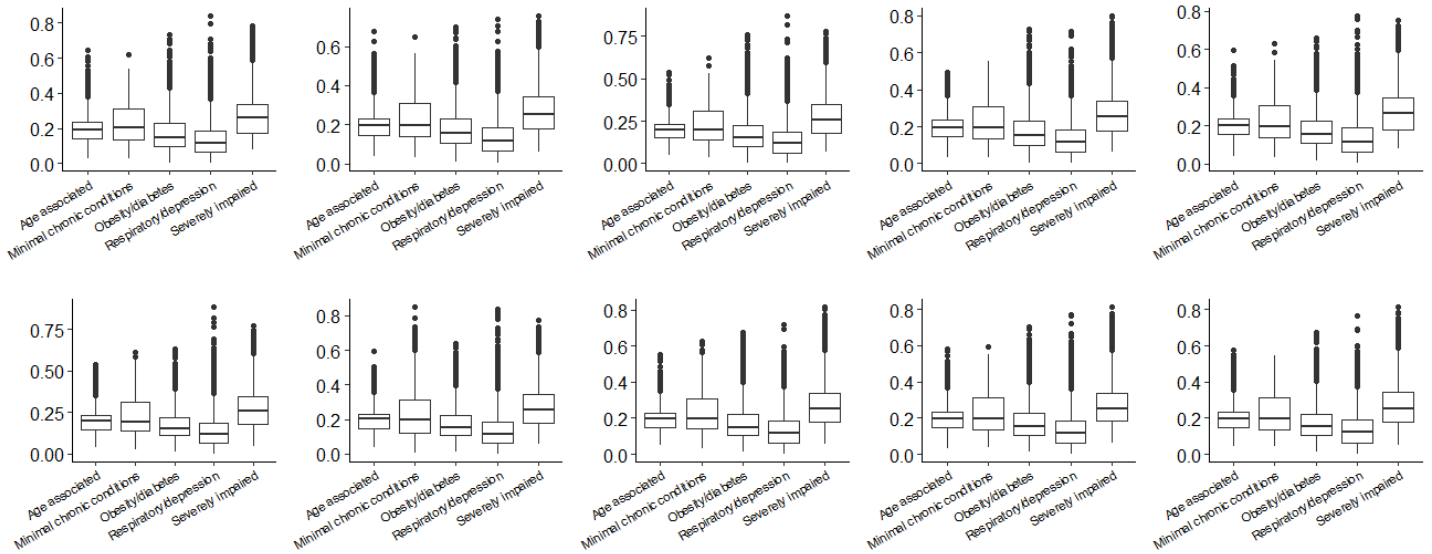

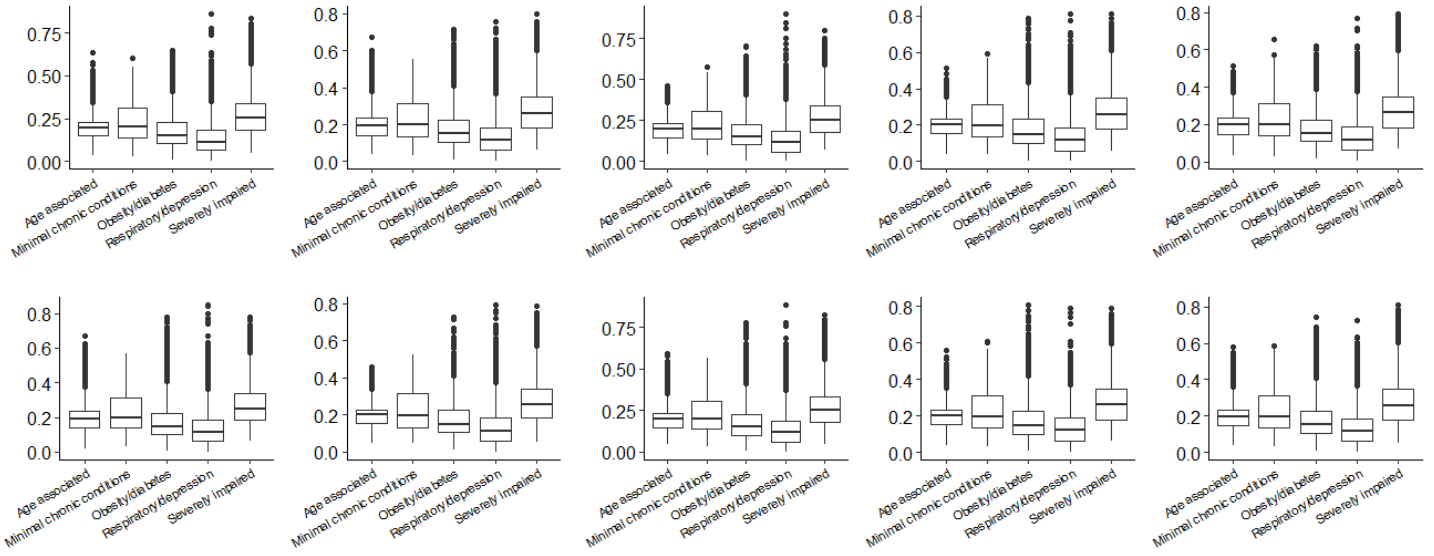

## Appendix 5: Missing Pattern of Variables for Research Question 2

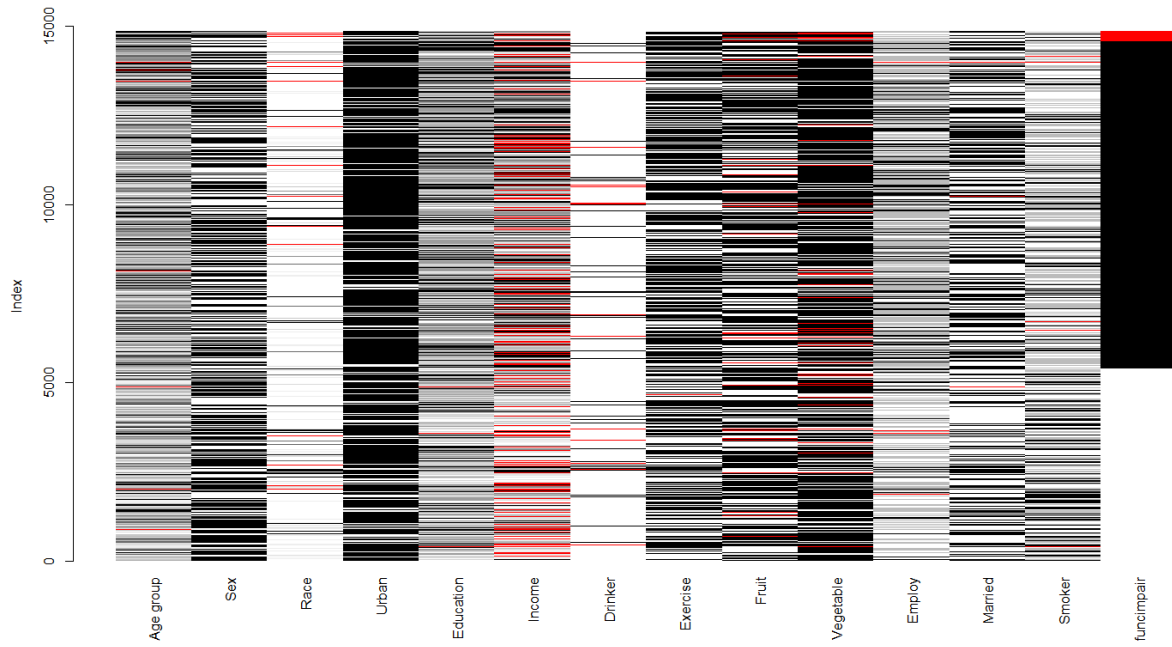

Note: darker colour indicates higher values; red color indicates missing; data are sorted by cognitive-related functional impairment.
